# Supplementary material for: Lectin-like oxidized low-density lipoprotein receptor-1 facilitates metastasis of gastric cancer through driving epithelial-mesenchymal transition and PI3K/Akt/GSK3β activation
Source: PubMed Central journal article supplement (PMC5366889; doi:10.1038/srep45275), 2017-03-27
Supplement: srep45275-s1.pdf [file srep45275-s1.pdf]

**Lectin-like oxidized low-density lipoprotein receptor-1 facilitates metastasis of gastric cancer through driving epithelial-mesenchymal transition and PI3K/Akt/GSK3 $\beta$  activation**

Can Li<sup>1,2</sup>, Jie Zhang<sup>1,3</sup>, Hao Wu<sup>1,2</sup>, Lili Li<sup>1,2</sup>, Caiting Yang<sup>1,2</sup>, Shushu Song<sup>1,2</sup>, Peike Peng<sup>1,2</sup>, Miaomiao Shao<sup>1,2</sup>, Mingming Zhang<sup>1,2</sup>, Junjie Zhao<sup>4</sup>, Ran Zhao<sup>3</sup>, Weicheng Wu<sup>1,2</sup>, Yuanyuan Ruan<sup>1,2</sup>, Lan Wang<sup>1,2\*</sup>, Jianxin Gu<sup>1,2,3</sup>

**Supplementary Information**

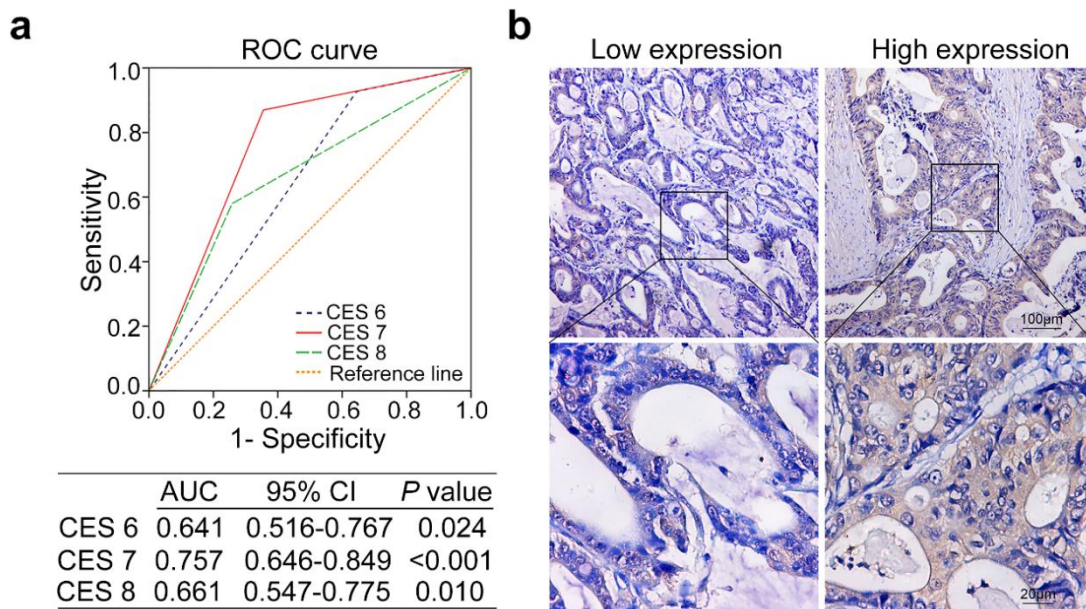

**Supplementary Figure S1. The ROC curve analyses of LOX-1 immunohistochemistry staining.** (a) Receiver operating characteristic (ROC) curve analyses of different cutoff values of composite expression score (CES), and the area under the ROC curve (AUC), 95% confident interval (95% CI) and P value are shown. (b) Representative images show low LOX-1 expression (Left panel) and high LOX-1 expression (Right panel) in gastric cancer tissues.

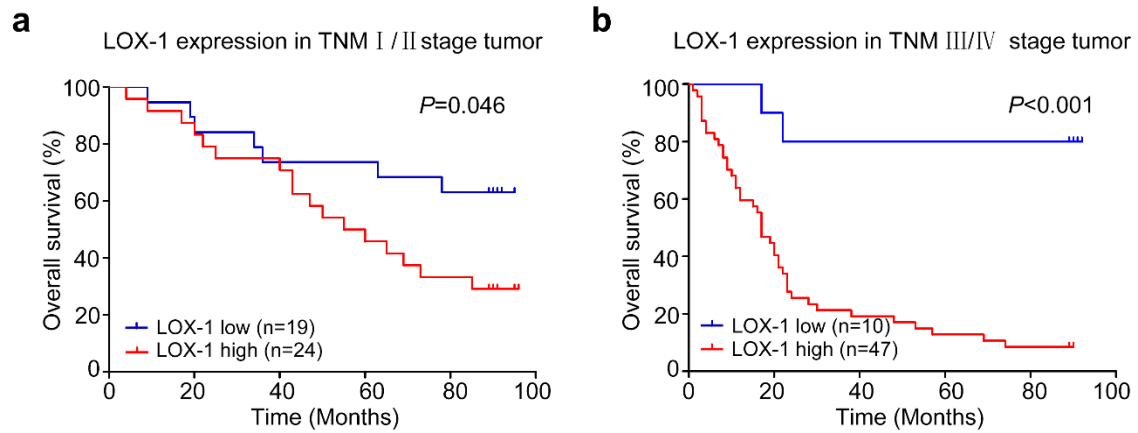

**Supplementary Figure S2. Subgroup analyses of overall survival for patients with gastric cancer according to LOX-1 expression.** Kaplan–Meier analyses of overall survival were performed in gastric cancer patients with early-stage cancer (TNM I/II) (**a**) and advanced-stage cancer (TNM III/IV) (**b**).
